# Supplementary material for: Physical Activity and Fundamental Motor Skill Performance of 5–10 Year Old Children in Three Different Playgrounds
Source: MDPI journal article supplement (doi:10.3390/ijerph15091896), 2018-08-31
Supplement: s1 [file s1]

**Table S1.** Comparison of equipment between playgrounds.

|                     | Traditional<br>Playground | Contemporary<br>Playground | Adventure<br>Playground |
|---------------------|---------------------------|----------------------------|-------------------------|
| Enclosed slide      | ✓                         |                            |                         |
| Traditional slide   | ✓                         | ✓                          | ✓                       |
| Curved slide        | ✓                         |                            |                         |
| Spiral slide        | ✓                         | ✓                          |                         |
| Crawl tunnel        | ✓                         | ✓                          |                         |
| Spiral              | ✓                         |                            |                         |
| Climb wall          | ✓                         | ✓                          | ✓                       |
| Bridge              | ✓                         | ✓                          |                         |
| Chain ladder        | ✓                         | ✓                          |                         |
| Loop ladder         | ✓                         |                            |                         |
| Metal ladder        | ✓                         | ✓                          |                         |
| Steps               | ✓                         |                            |                         |
| Fireman pole        | ✓                         | ✓                          |                         |
| Steps               | ✓                         | ✓                          |                         |
| Shop front          | ✓                         | ✓                          |                         |
| Swings              | ✓                         | ✓                          | ✓                       |
| See-saw             | ✓                         | ✓                          | ✓                       |
| Wooden beam         | ✓                         |                            |                         |
| Rockers             | ✓                         | ✓                          | ✓                       |
| Seat and metal pole | ✓                         |                            |                         |
| Park bench          | ✓                         |                            |                         |
| Concrete wall       | ✓                         |                            |                         |
| Exercise equipment  | ✓                         |                            |                         |
| Oval/green space    | ✓                         | ✓                          | ✓                       |
| Castle              |                           | ✓                          |                         |
| Speak tube          |                           | ✓                          |                         |
| Mound               |                           | ✓                          | ✓                       |
| Ground slide        |                           | ✓                          |                         |
| Rope                |                           | ✓                          |                         |
| Poles               |                           | ✓                          |                         |
| Tyres               |                           | ✓                          |                         |
| Metal slide         |                           | ✓                          |                         |
| Climb net           |                           | ✓                          | ✓                       |
| Walkway             |                           | ✓                          | ✓                       |
| Double slide        |                           | ✓                          | ✓                       |
| Uneven poles        |                           | ✓                          |                         |
| Monkey bars         |                           | ✓                          | ✓                       |
| Flying fox          |                           | ✓                          | ✓                       |
| Swing cube          |                           | ✓                          |                         |
| Scramble net        |                           | ✓                          | ✓                       |
| Spin roundabout     |                           | ✓                          |                         |
| Spin poles          |                           | ✓                          |                         |
| Climbing ropes      |                           |                            | ✓                       |
| Rock climbing wall  |                           |                            | ✓                       |
| Block steps         |                           |                            | ✓                       |
| Climbing circles    |                           |                            | ✓                       |
| Discs on poles      |                           |                            | ✓                       |
| Carved animals      |                           |                            | ✓                       |
| Wooden blocks       |                           |                            | ✓                       |
| Sandpit             |                           |                            | ✓                       |
| Chalkboard          |                           |                            | ✓                       |
| Bird nest swing     |                           |                            | ✓                       |
| Orange pipes        |                           |                            | ✓                       |
| Branches            |                           |                            | ✓                       |
| Family see-saw      |                           |                            | ✓                       |
| Spinner chair       |                           |                            | ✓                       |
| Basketball nets     |                           |                            | ✓                       |

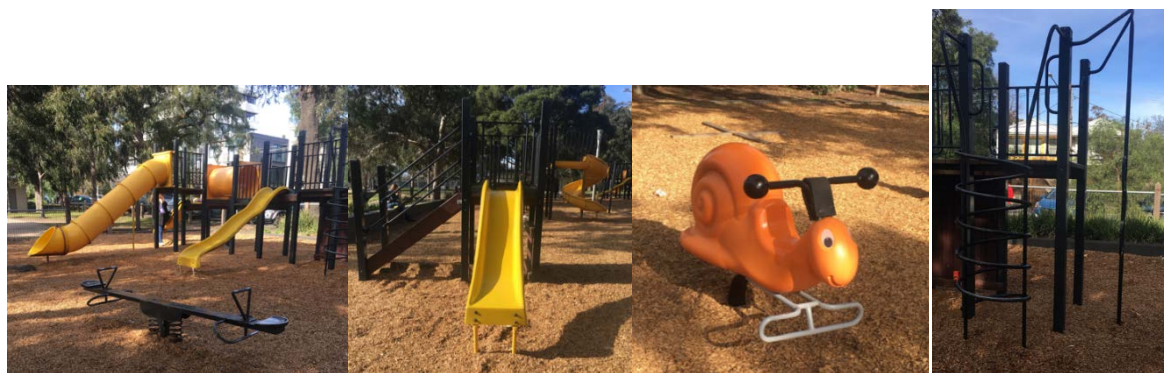

(a)

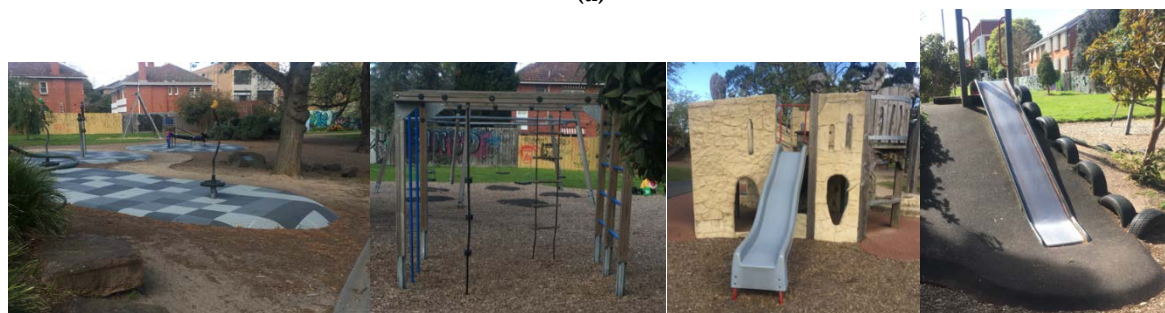

(b)

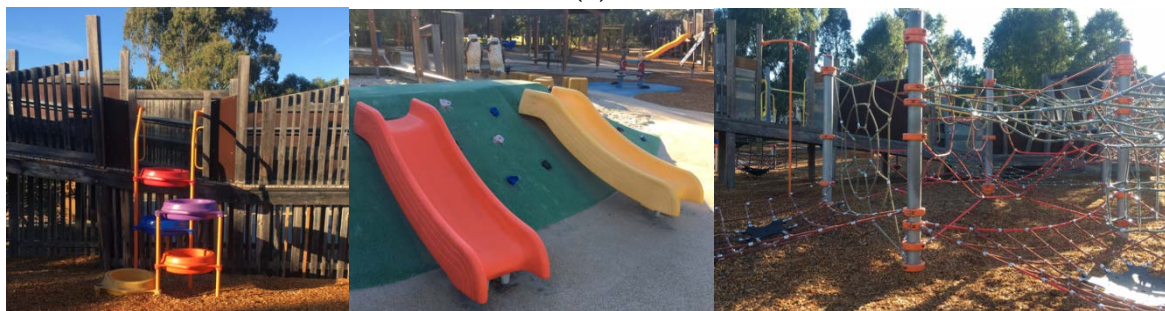

(c)

**Figure S1.** Images of playgrounds (a): Traditional playground; (b): Contemporary playground; (c): Adventure playground.

|          |                 |             |            |
|----------|-----------------|-------------|------------|
| 1. Stand | 7. Leap         | 11. Balance | 15. Kick   |
| 2. Walk  | 8. Jump         | 12. Climb   | 16. Catch  |
| 3. Run   | 9. Skip/Hop     | 13. Hang    | 17. Throw  |
| 4. Sit   | 10. Dodge/Slide | 14. Pull    | 18. Strike |
| 5. Lie   |                 | 19. Roll    |            |
| 6. Crawl |                 |             |            |

Date: \_\_\_\_\_ Park: Alma Park  
 Start Time: \_\_\_\_\_ Finish Time: \_\_\_\_\_  
 Sex: \_\_\_\_\_ Age: \_\_\_\_\_  
 ID Number: \_\_\_\_\_ Weather: \_\_\_\_\_

|    | Alone | With Others | No Equipment | Spin poles | Flying fox large | Spin roundabout | Swing cube | Red flying fox | Monkey bars | Uneven poles | Rockers | See-saw | Swings | Ladder | Double slide | Walkway | Fireman pole | Spiral slide | Climb net | Metal slide | Tyres | Poles | Ladders | Rope | Chain ladder | Climb wall | Ground slide | Fireman pole | Ladder | Steps | Mound | Steps | Shop front | Bridge | Ladder | Tunnel | Speak tube | Slide | Castle |  |
|----|-------|-------------|--------------|------------|------------------|-----------------|------------|----------------|-------------|--------------|---------|---------|--------|--------|--------------|---------|--------------|--------------|-----------|-------------|-------|-------|---------|------|--------------|------------|--------------|--------------|--------|-------|-------|-------|------------|--------|--------|--------|------------|-------|--------|--|
| 1  |       |             |              |            |                  |                 |            |                |             |              |         |         |        |        |              |         |              |              |           |             |       |       |         |      |              |            |              |              |        |       |       |       |            |        |        |        |            |       |        |  |
| 2  |       |             |              |            |                  |                 |            |                |             |              |         |         |        |        |              |         |              |              |           |             |       |       |         |      |              |            |              |              |        |       |       |       |            |        |        |        |            |       |        |  |
| 3  |       |             |              |            |                  |                 |            |                |             |              |         |         |        |        |              |         |              |              |           |             |       |       |         |      |              |            |              |              |        |       |       |       |            |        |        |        |            |       |        |  |
| 4  |       |             |              |            |                  |                 |            |                |             |              |         |         |        |        |              |         |              |              |           |             |       |       |         |      |              |            |              |              |        |       |       |       |            |        |        |        |            |       |        |  |
| 5  |       |             |              |            |                  |                 |            |                |             |              |         |         |        |        |              |         |              |              |           |             |       |       |         |      |              |            |              |              |        |       |       |       |            |        |        |        |            |       |        |  |
| 6  |       |             |              |            |                  |                 |            |                |             |              |         |         |        |        |              |         |              |              |           |             |       |       |         |      |              |            |              |              |        |       |       |       |            |        |        |        |            |       |        |  |
| 7  |       |             |              |            |                  |                 |            |                |             |              |         |         |        |        |              |         |              |              |           |             |       |       |         |      |              |            |              |              |        |       |       |       |            |        |        |        |            |       |        |  |
| 8  |       |             |              |            |                  |                 |            |                |             |              |         |         |        |        |              |         |              |              |           |             |       |       |         |      |              |            |              |              |        |       |       |       |            |        |        |        |            |       |        |  |
| 9  |       |             |              |            |                  |                 |            |                |             |              |         |         |        |        |              |         |              |              |           |             |       |       |         |      |              |            |              |              |        |       |       |       |            |        |        |        |            |       |        |  |
| 10 |       |             |              |            |                  |                 |            |                |             |              |         |         |        |        |              |         |              |              |           |             |       |       |         |      |              |            |              |              |        |       |       |       |            |        |        |        |            |       |        |  |
| 11 |       |             |              |            |                  |                 |            |                |             |              |         |         |        |        |              |         |              |              |           |             |       |       |         |      |              |            |              |              |        |       |       |       |            |        |        |        |            |       |        |  |
| 12 |       |             |              |            |                  |                 |            |                |             |              |         |         |        |        |              |         |              |              |           |             |       |       |         |      |              |            |              |              |        |       |       |       |            |        |        |        |            |       |        |  |
| 13 |       |             |              |            |                  |                 |            |                |             |              |         |         |        |        |              |         |              |              |           |             |       |       |         |      |              |            |              |              |        |       |       |       |            |        |        |        |            |       |        |  |
| 14 |       |             |              |            |                  |                 |            |                |             |              |         |         |        |        |              |         |              |              |           |             |       |       |         |      |              |            |              |              |        |       |       |       |            |        |        |        |            |       |        |  |
| 15 |       |             |              |            |                  |                 |            |                |             |              |         |         |        |        |              |         |              |              |           |             |       |       |         |      |              |            |              |              |        |       |       |       |            |        |        |        |            |       |        |  |
| 16 |       |             |              |            |                  |                 |            |                |             |              |         |         |        |        |              |         |              |              |           |             |       |       |         |      |              |            |              |              |        |       |       |       |            |        |        |        |            |       |        |  |
| 17 |       |             |              |            |                  |                 |            |                |             |              |         |         |        |        |              |         |              |              |           |             |       |       |         |      |              |            |              |              |        |       |       |       |            |        |        |        |            |       |        |  |
| 18 |       |             |              |            |                  |                 |            |                |             |              |         |         |        |        |              |         |              |              |           |             |       |       |         |      |              |            |              |              |        |       |       |       |            |        |        |        |            |       |        |  |
| 19 |       |             |              |            |                  |                 |            |                |             |              |         |         |        |        |              |         |              |              |           |             |       |       |         |      |              |            |              |              |        |       |       |       |            |        |        |        |            |       |        |  |
| 20 |       |             |              |            |                  |                 |            |                |             |              |         |         |        |        |              |         |              |              |           |             |       |       |         |      |              |            |              |              |        |       |       |       |            |        |        |        |            |       |        |  |
| 21 |       |             |              |            |                  |                 |            |                |             |              |         |         |        |        |              |         |              |              |           |             |       |       |         |      |              |            |              |              |        |       |       |       |            |        |        |        |            |       |        |  |

**Figure S2.** Observation chart (Observation chart developed for the contemporary playground. For each scan, the corresponding FMS number was written in the box matching the piece of equipment the child was playing on.).
